# Supplementary material
Source: MDPI journal article supplement (https://www.mdpi.com/1996-1073/14/23/8168)
Supplement: s1 [file s1]

# Supplementary information

for

## Flexible films as anode materials based on rGO and $\text{TiO}_2/\text{MnO}_2$ in Li-ion batteries free of non-active agents

by

Tomasz Kędzierski<sup>1</sup>, Daria Baranowska<sup>1</sup>, Damian Bęben<sup>2,3</sup>, Beata Zielińska<sup>1</sup>, Xuecheng Chen<sup>1</sup>, Ewa Mijowska<sup>1</sup>

<sup>1</sup>*Department of Nanomaterials Physicochemistry, Faculty of Chemical Technology and Engineering, West Pomeranian University of Technology in Szczecin, Piastów 45, 70-311 Szczecin, Poland*

<sup>2</sup>*Nanores Sp. z o.o. Sp.k., Bierutowska 57-59, 51-317 Wrocław, Poland.*

<sup>3</sup>*Institute of Low Temperature and Structure Research, Polish Academy of Sciences in Wrocław, Okólna 2, 50-420 Wrocław, Poland.*

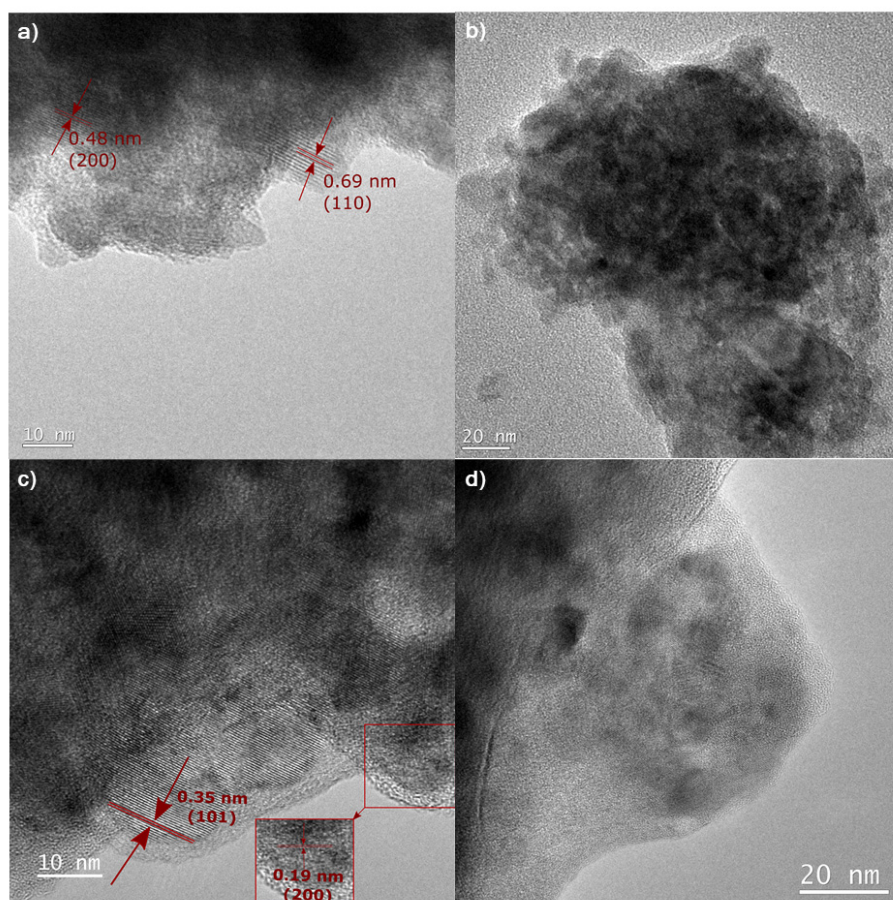

**Figure S1.** TEM images of (a,b)  $\text{MnO}_2$  and (c,d)  $\text{TiO}_2$ .

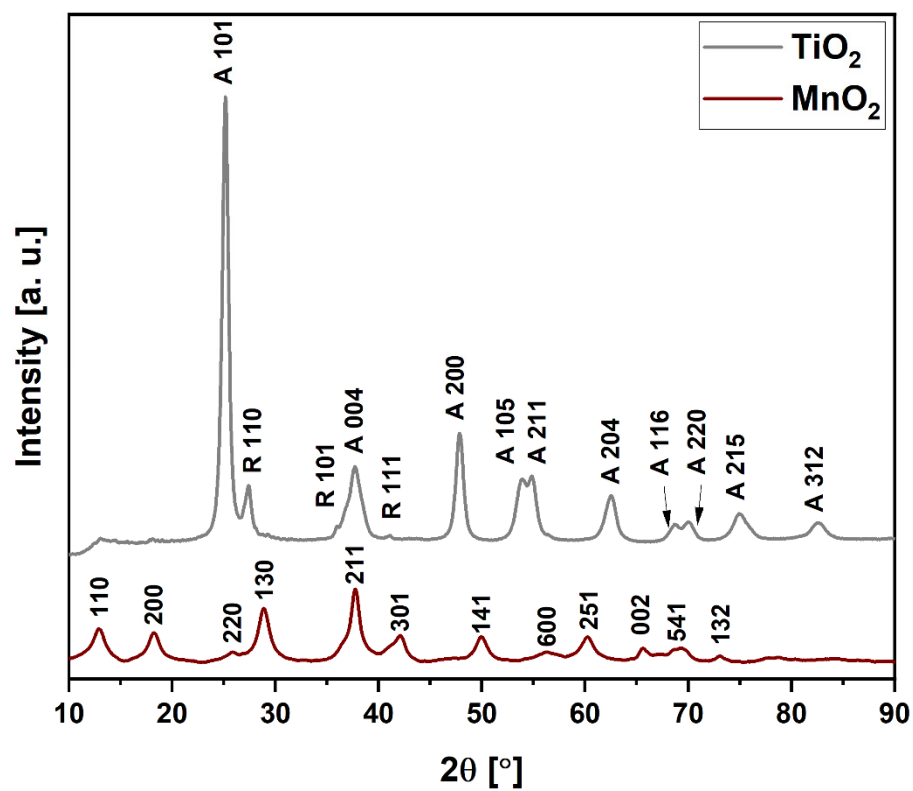

**Figure S2.** XRD diffractograms of  $\text{TiO}_2$  and  $\text{MnO}_2$ . A – anatase phase, R – rutile phase.

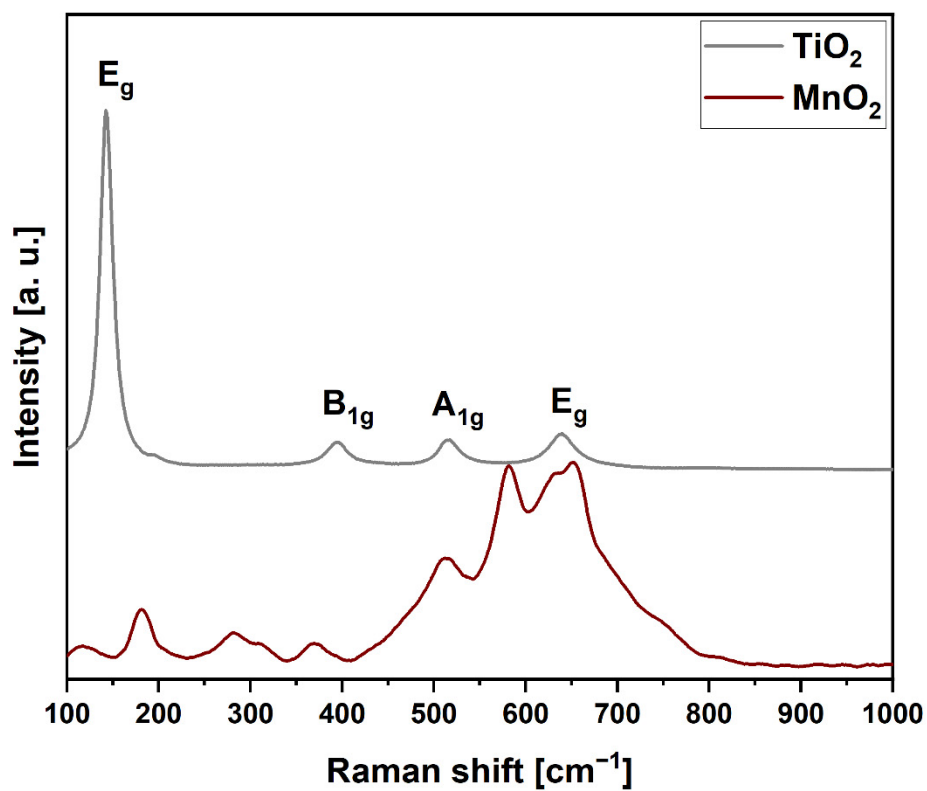

Figure S3. Raman spectra of  $\text{TiO}_2$  and  $\text{MnO}_2$ .

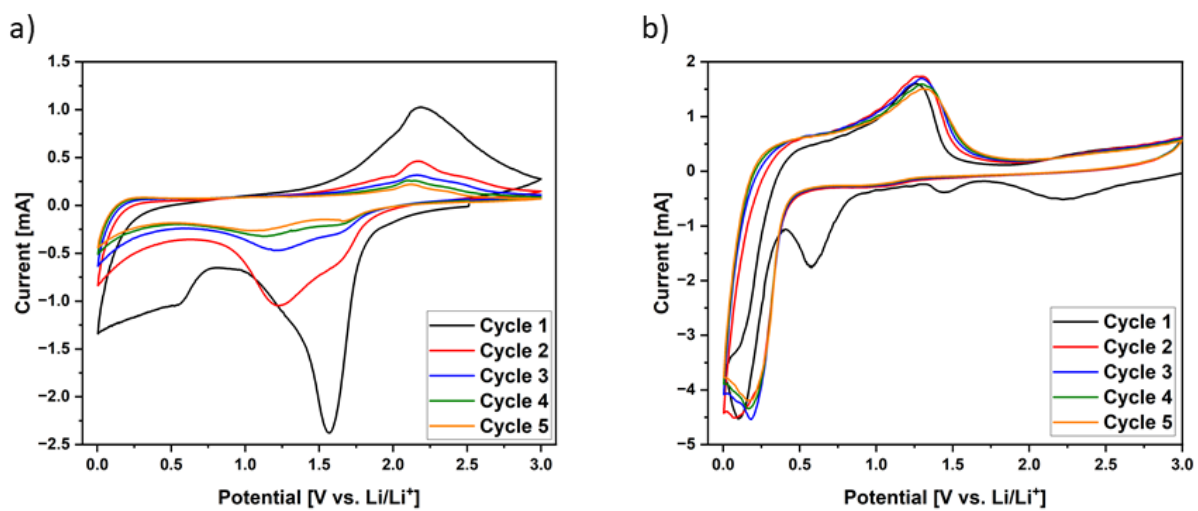

Figure S4. Cyclic voltammetry of pristine (a)  $\text{TiO}_2$  and (b)  $\text{MnO}_2$ .

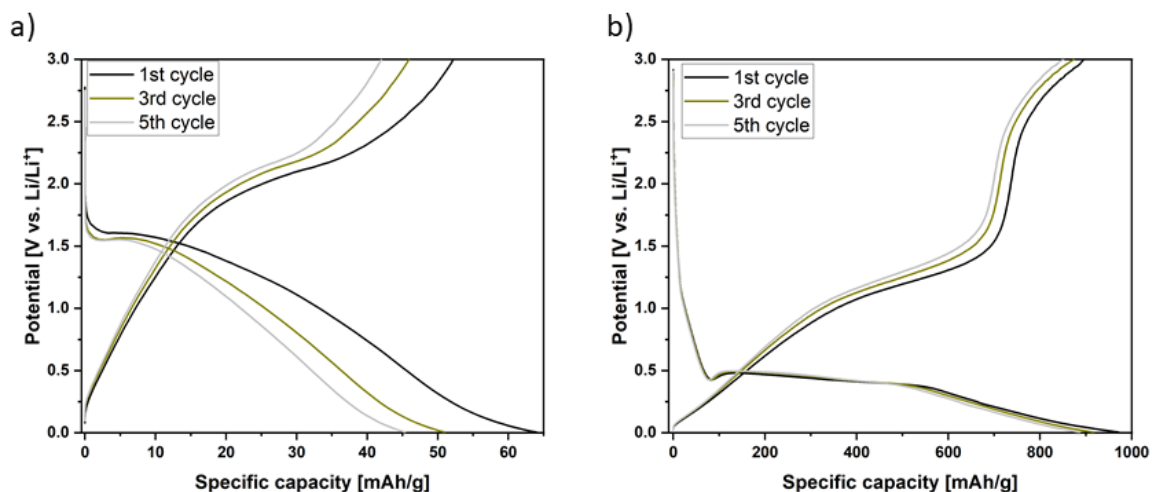

Figure S5. Discharge-charge profiles of (a)  $\text{TiO}_2$  and (b)  $\text{MnO}_2$  at a current density of 50 mA/g.

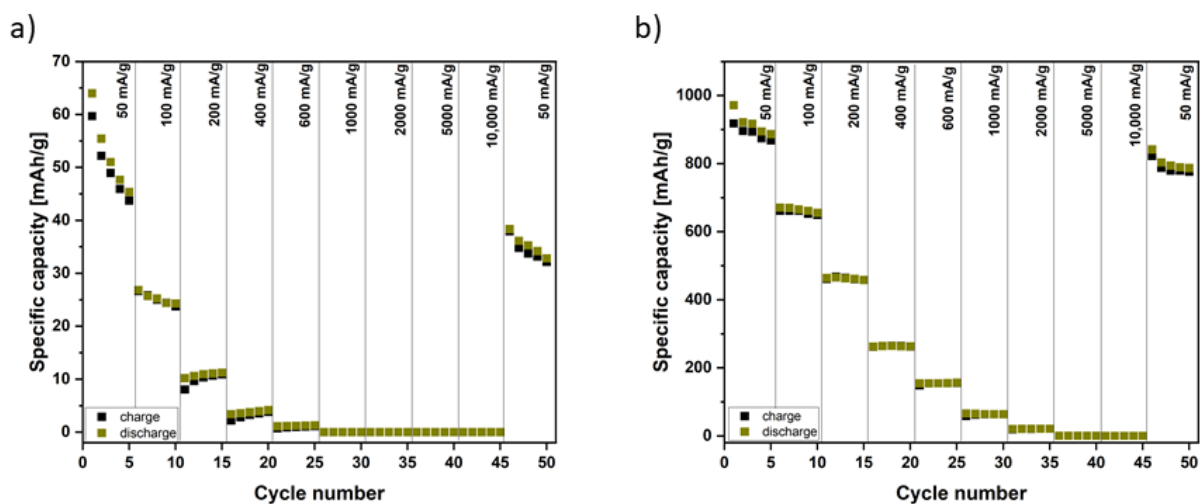

Figure S6. Rate performance of (a)  $\text{TiO}_2$  and (b)  $\text{MnO}_2$  at different current densities.

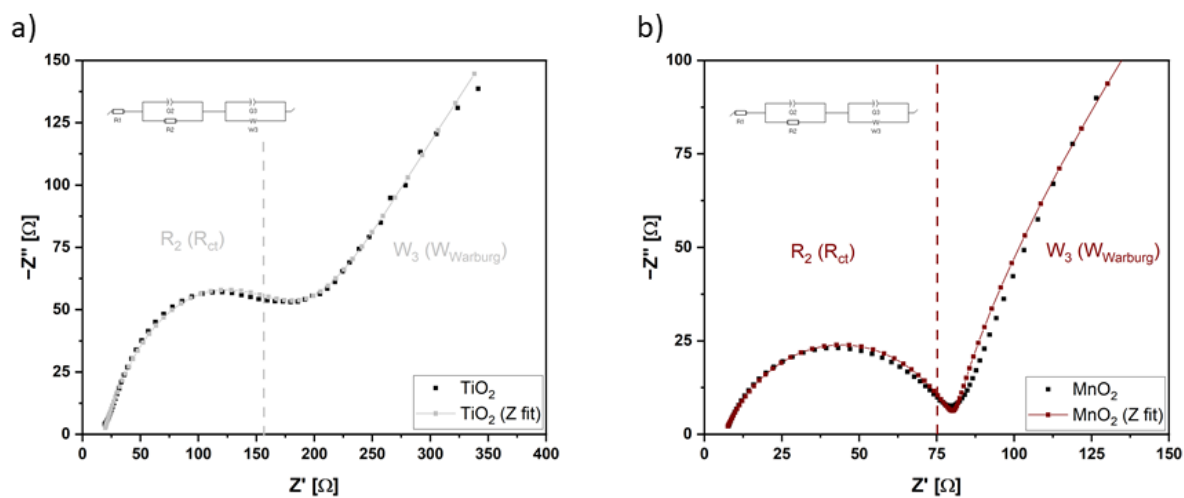

Figure S7. Nyquist plots of (a)  $\text{TiO}_2$  and (b)  $\text{MnO}_2$  after discharge/charge cycles and the equivalent circuit diagram of the cells.

**Table S1.** Fitted results of equivalent circuit in Figure S7.

| Sample           | $R_s$ [ $\Omega$ ] | $R_{ct}$ [ $\Omega$ ] |
|------------------|--------------------|-----------------------|
| TiO <sub>2</sub> | 17.91              | 156.9                 |
| MnO <sub>2</sub> | 6.49               | 75.23                 |
